# Supplementary material for: Measurement invariance across gender and age groups, validity and reliability of the Chinese version of the short-form supportive care needs survey questionnaire (SCNS-SF34)
Source: Springer Nature journal article supplement (doi:10.1186/s12955-020-01289-0), 2020-02-17

Measurement invariance across gender, Model 1

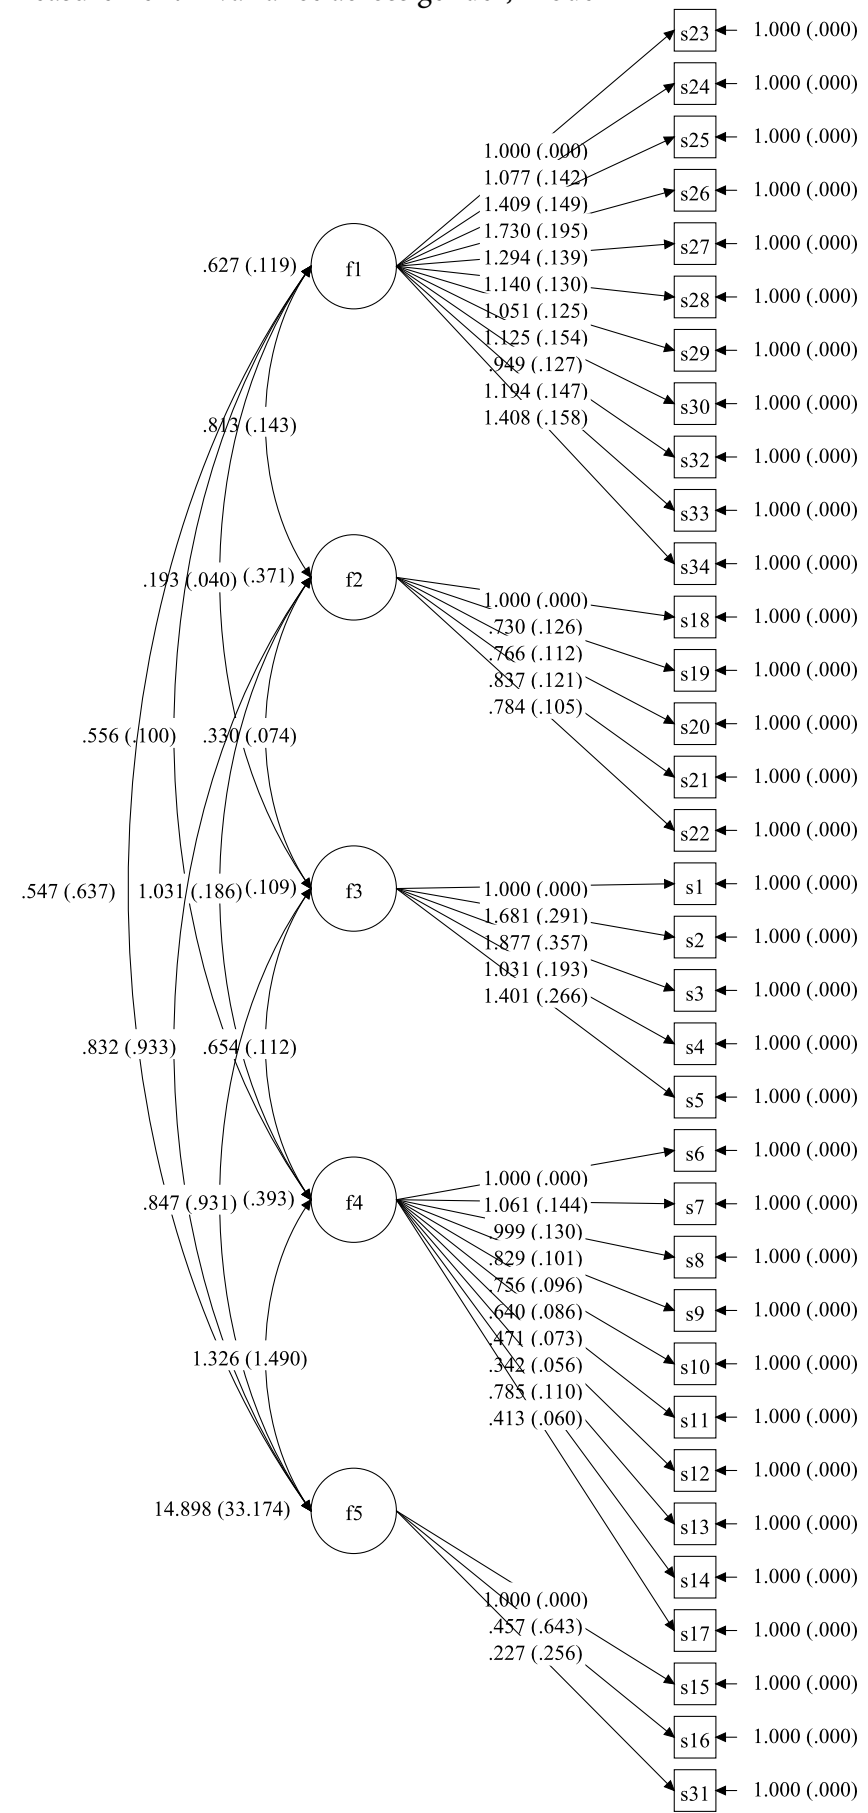

Measurement invariance across gender, Model 2

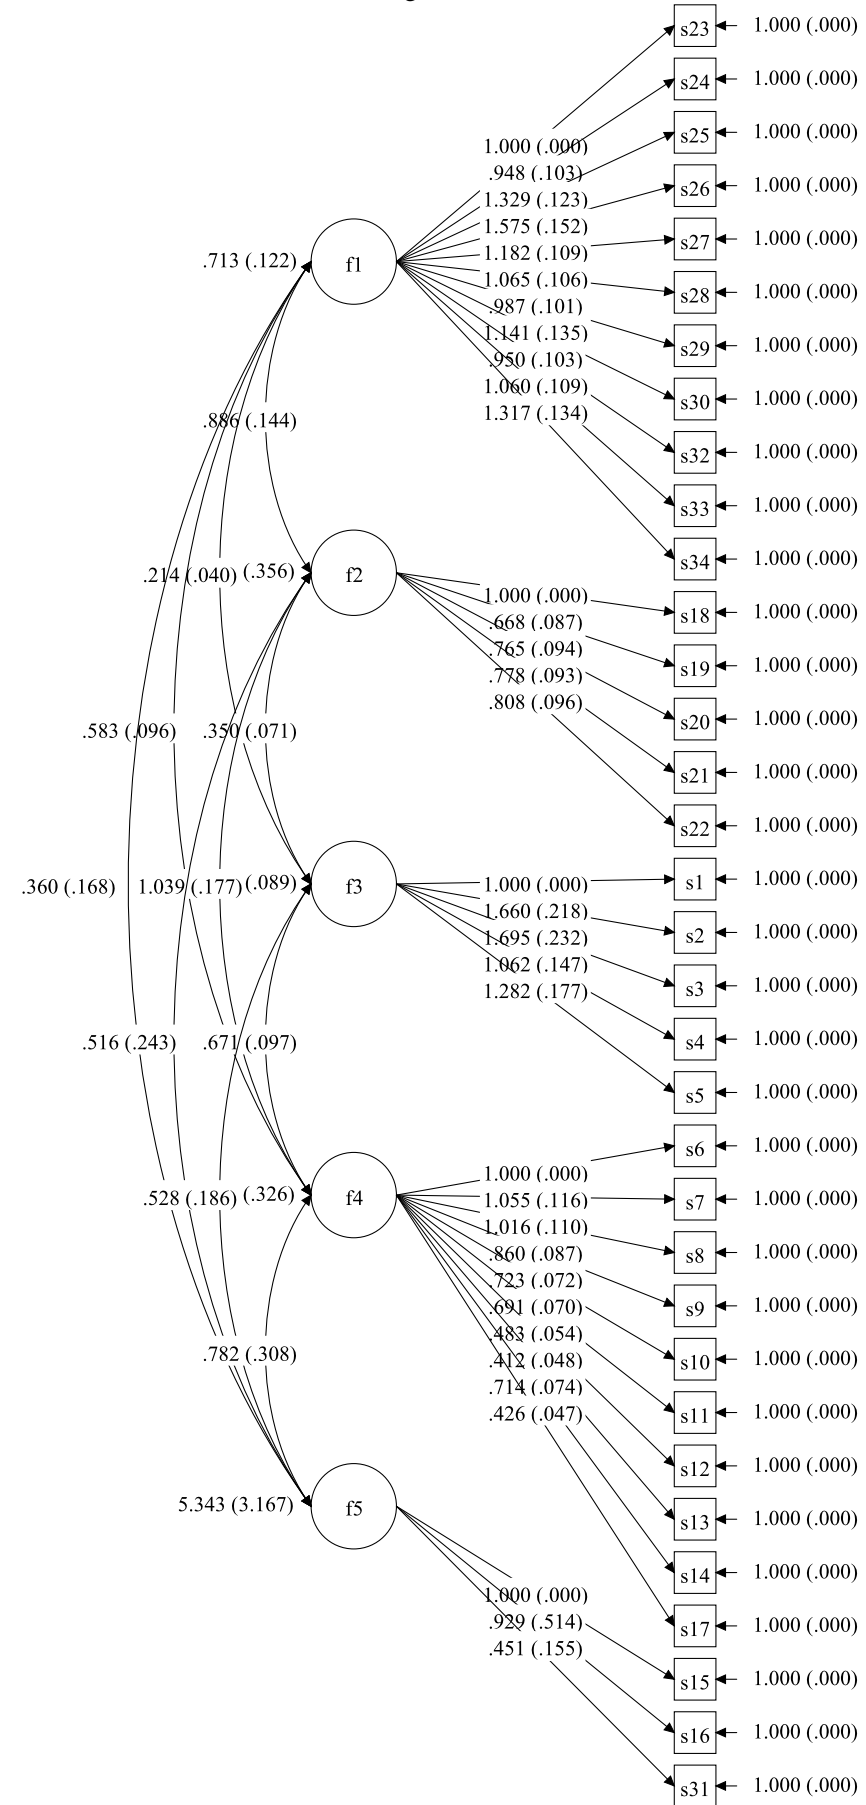

Measurement invariance across age, Model 1

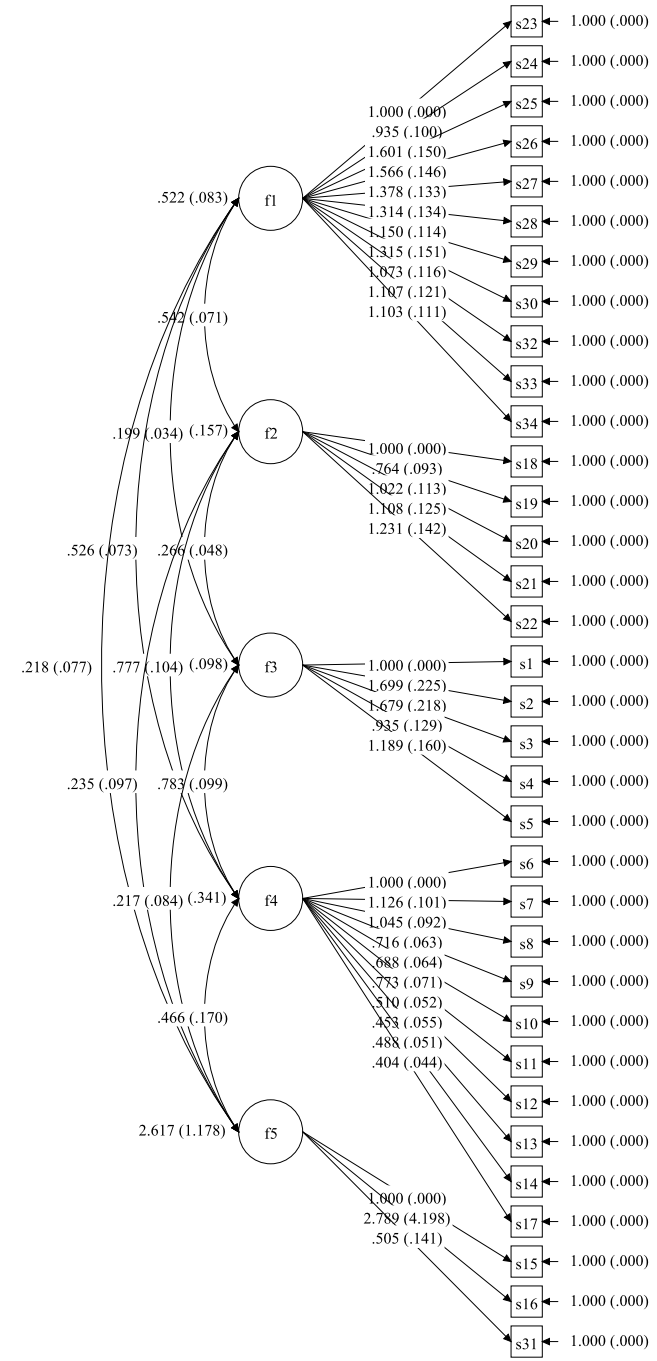

Measurement invariance across age, Model 2

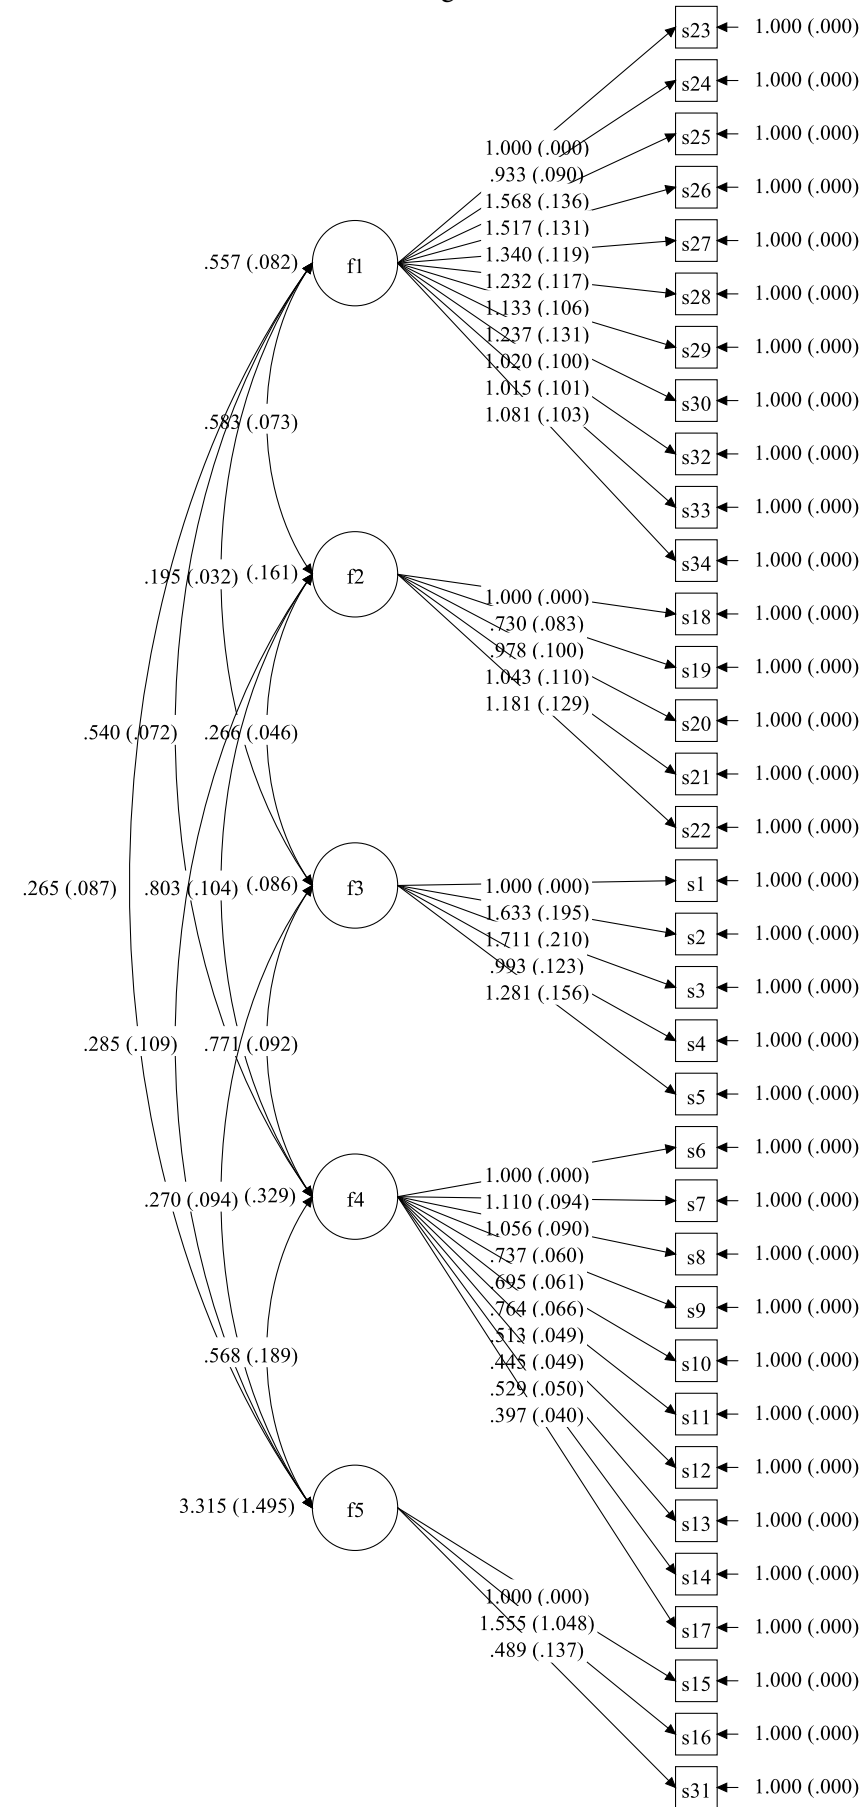

Supplement: MOESM1 [file 17715838]
